# Supplementary material for: An Integrated Genomic and Transcriptomic Analysis Reveals Candidates of Susceptibility Genes for Crohn’s Disease in Japanese Populations
Source: PubMed Central journal article supplement (PMC7314801; doi:10.1038/s41598-020-66951-5), 2020-06-24
Supplement: 41598_2020_66951_MOESM1_ESM.pdf [file 41598_2020_66951_MOESM1_ESM.pdf]

# Supplementary Materials

## **An Integrated Genomic and Transcriptomic Analysis Reveals Candidates of Susceptibility Genes for Crohn's Disease in Japanese Populations**

Yoichi Kakuta<sup>1</sup>, Ryo Ichikawa<sup>1</sup>, Yuta Fuyuno<sup>2</sup>, Atsushi Hirano<sup>2</sup>, Junji Umeno<sup>2</sup>, Takehiro Torisu<sup>2</sup>, Kazuhiro Watanabe<sup>3</sup>, Akihiro Asakura<sup>4</sup>, Takeru Nakano<sup>1</sup>, Yasuhiro Izumiyama<sup>1</sup>, Daisuke Okamoto<sup>1</sup>, Takeo Naito<sup>1</sup>, Rintaro Moroi<sup>1</sup>, Masatake Kuroha<sup>1</sup>, Yoshitake Kanazawa<sup>1</sup>, Tomoya Kimura<sup>1</sup>, Hisashi Shiga<sup>1</sup>, Takeshi Naito<sup>3</sup>, Motohiro Esaki<sup>2,5</sup>, Yosuke Kawai<sup>6</sup>, Katsushi Tokunaga<sup>6</sup>, Minoru Nakamura<sup>7</sup>, Takayuki Matsumoto<sup>2,8</sup>, Masao Nagasaki<sup>4,9</sup>, Yoshitaka Kinouchi<sup>10</sup>, Michiaki Unno<sup>3</sup>, Atsushi Masamune<sup>1</sup>

<sup>1</sup> Division of Gastroenterology, Tohoku University Graduate School of Medicine, Sendai, Japan

<sup>2</sup> Department of Medicine and Clinical Science, Graduate School of Medical Sciences, Kyushu University, Fukuoka, Japan

<sup>3</sup> Department of Surgery, Tohoku University Graduate School of Medicine, Sendai, Japan

<sup>4</sup> Human Biosciences Unit for the Top Global Course Center for the Promotion of Interdisciplinary Education and Research (CPIER), Kyoto University, Kyoto, Japan

<sup>5</sup> Department of Endoscopic Diagnostics and Therapeutics, Saga University Hospital, Saga, Japan

<sup>6</sup> Genome Medical Science Project, National Center for Global Health and Medicine, Tokyo, Japan

<sup>7</sup> Clinical Research Center, National Hospital Organisation (NHO) Nagasaki Medical Center, Omura, Japan

<sup>8</sup> Division of Gastroenterology, Department of Internal Medicine, Faculty of Medicine, Iwate Medical University, Morioka, Japan

<sup>9</sup> Department of Integrative Genomics, Tohoku Medical Megabank Organization, Tohoku University, Sendai, Japan

<sup>10</sup> Student Health Care Center, Institute for Excellence in Higher Education, Tohoku University, Sendai, Japan

## Supplementary figure legends

### Figure S1. Manhattan plots of GWAS in Japanese CD patients

Red line indicates  $p = 5e-08$ , where genes above the red line were defined to have significant correlation. Blue line indicates  $p = 1e-05$ , where genes above the blue line were defined to have correlation of a candidate level. All genes showing significant correlation were located in two regions: one in the *HLA* region on chromosome 6 and the other upstream of *TNFSF15* on chromosome 9. Candidate levels of correlation were detected in a further 23 regions.

### Figure S2. Integrated analysis of GWAS and eQTLs of effector memory T cells from LPMC

A total of 19 SNPs was overlapped between the 671 SNPs which showed more than a candidate level of correlation in GWAS and 22,632 SNP-gene pairs which showed more than a candidate level of correlation in eQTL analysis.

### Figure S3. Correlation plots of SNPs in candidate regions that showed correlation by TWAS

Figure shows plots of polymorphism periphery of five genes (a. *APOBEC3A*, b. *RAP1A*, c. *NPIP9*, d. *WDR31*, and e. *IGLV3-29*) that showed correlation by TWAS. Each dot indicates  $-\log_{10}$  (p-values) before (gray) and after (blue) adjustment by gene (green) that showed correlation.

Supplementary Figure S1

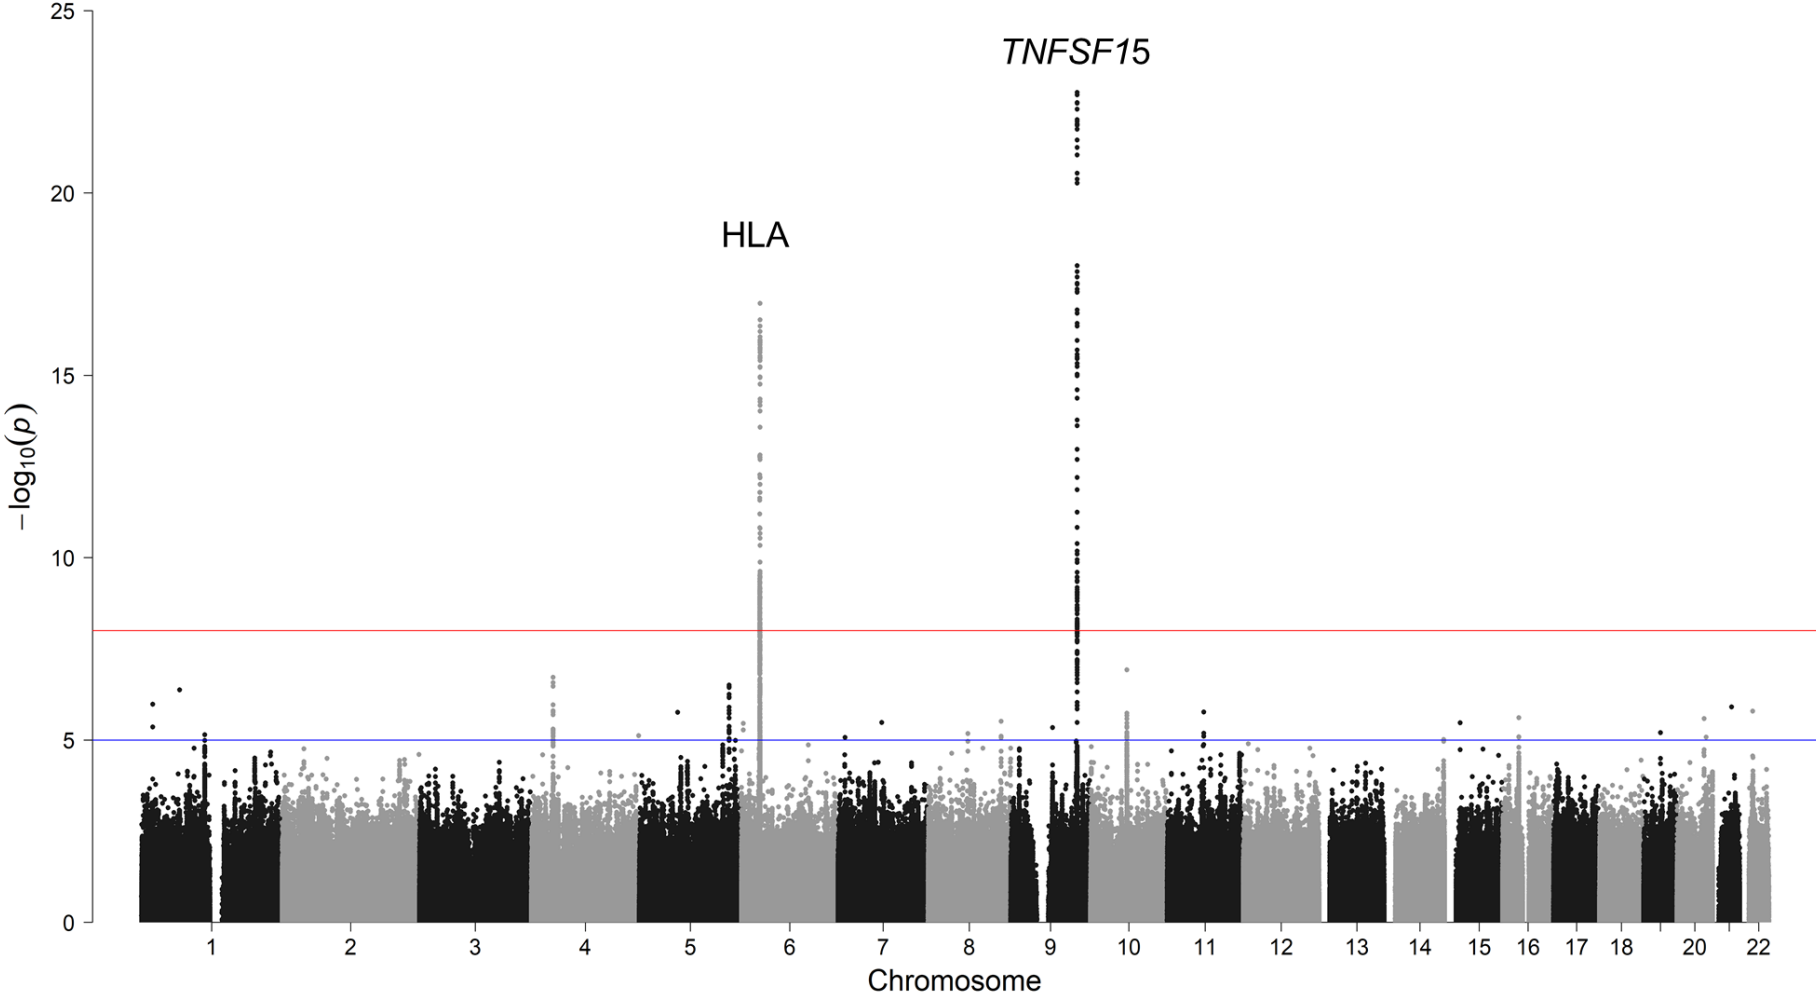

Supplementary Figure S2

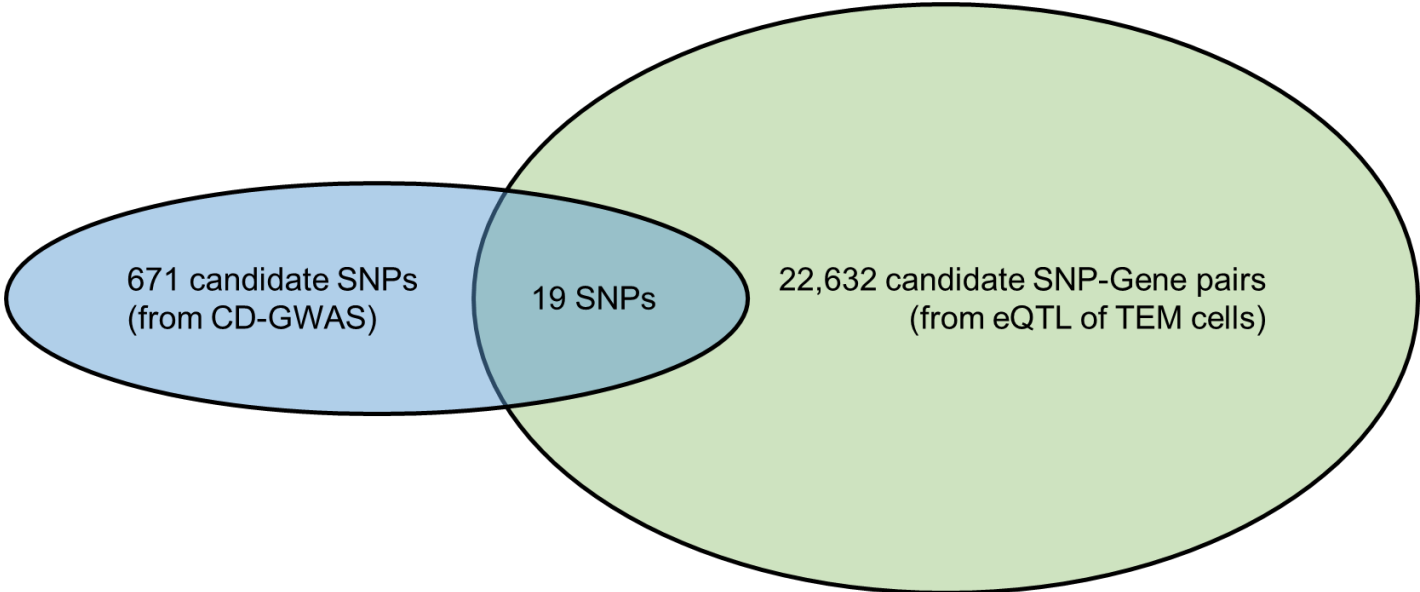

Supplementary Figure S3

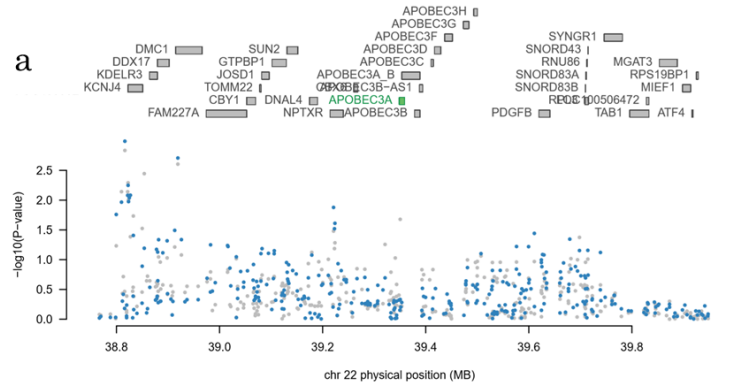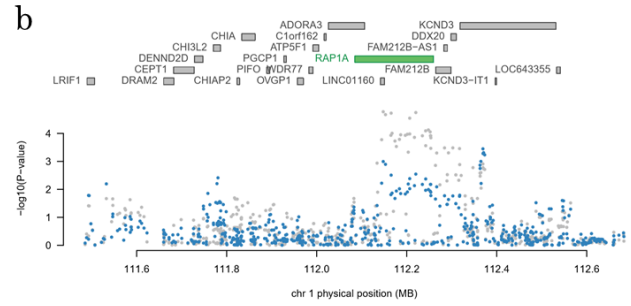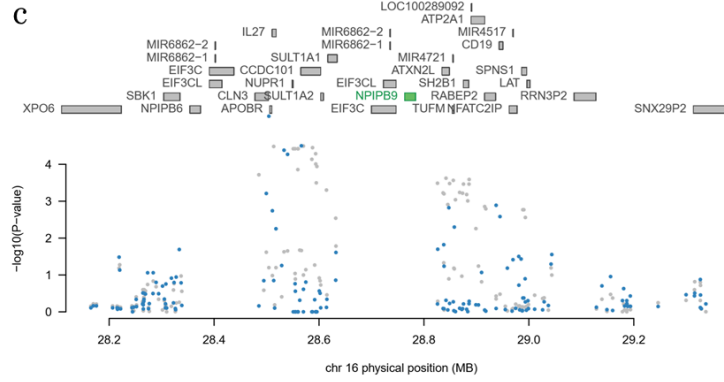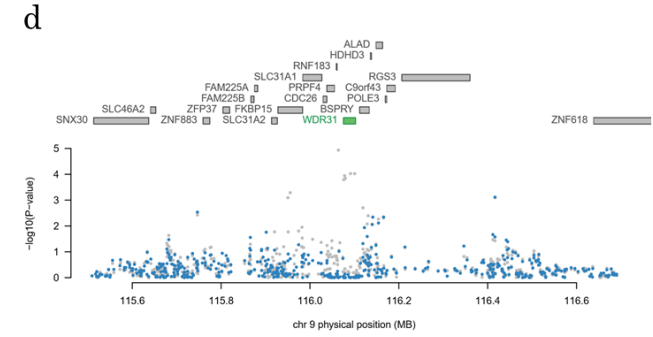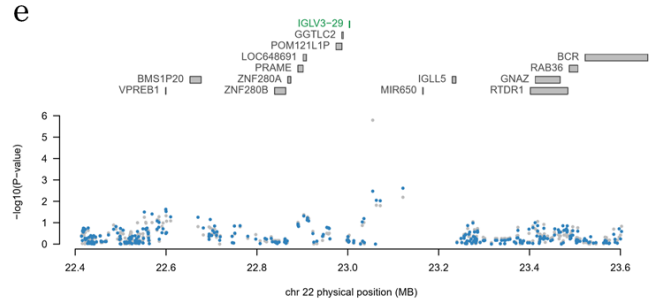

## Supplementary tables

### Supplementary Table S1. Significant eQTLs of effector memory T cells from LPMC

(Separate Excel file)

### Supplementary Table S2. Candidate eQTLs of effector memory T cells from LPMC

(Separate Excel file)

### Supplementary Table S3. Non-synonymous SNPs from CD-GWAS results

| Chromosome | Position* | SNP ID     | Gene    | Exon  | Function    | A1 | A2 | A2 frequencies | p-values | OR(95%CI)        |
|------------|-----------|------------|---------|-------|-------------|----|----|----------------|----------|------------------|
| 1          | 67648596  | rs76418789 | IL23R   | exon4 | p.Gly149Arg | G  | A  | 0.053          | 4.22E-07 | 0.88 (0.84-0.93) |
| 16         | 28513403  | rs181206   | IL27    | exon4 | p.Leu119Pro | A  | G  | 0.083          | 3.28E-05 | 1.08 (1.04-1.12) |
| 16         | 28603655  | rs1059491  | SULT1A2 | exon7 | p.Asn235Thr | T  | G  | 0.074          | 4.38E-05 | 1.08 (1.04-1.12) |

\*Positions are based on the Genome Reference Consortium human build 37 (GRCh37)

**Supplementary Table S4.** Common SNPs between the CD-GWAS results and eQTL of TEM.

| Chromosome | SNP         |           |    | GWAS |                                  | eQTL     |                   |                  |      |                   |       |
|------------|-------------|-----------|----|------|----------------------------------|----------|-------------------|------------------|------|-------------------|-------|
|            | SNP ID      | Position* | A1 | A2   | A2<br>requeencies<br>to the gene | Distance | P <sub>GWAS</sub> | OR(95%CI)        | Gene | P <sub>eQTL</sub> | Slope |
| 6          | rs117419513 | 32216166  | G  | A    | 0.121                            | 239774   | 4.21E-06          | 1.09 (1.05-1.14) | TNXA | 3.49E-05          | 1.17  |
| 6          | rs117115819 | 32216355  | T  | C    | 0.121                            | 239963   | 4.21E-06          | 1.09 (1.05-1.14) | TNXA | 3.49E-05          | 1.17  |
| 6          | rs28681257  | 32216934  | A  | G    | 0.121                            | 240542   | 4.21E-06          | 1.09 (1.05-1.14) | TNXA | 3.49E-05          | 1.17  |
| 6          | rs4713514   | 32220741  | A  | C    | 0.121                            | 244349   | 4.93E-06          | 1.09 (1.05-1.14) | TNXA | 3.49E-05          | 1.17  |
| 6          | rs117465038 | 32234981  | T  | A    | 0.109                            | 258589   | 4.68E-06          | 1.10 (1.06-1.15) | TNXA | 3.49E-05          | 1.17  |
| 6          | rs117892681 | 32305814  | C  | A    | 0.103                            | 329422   | 5.05E-06          | 1.10 (1.06-1.15) | TNXA | 4.45E-05          | 1.20  |
| 6          | rs117892681 | 32305814  | C  | A    | 0.103                            | 329422   | 5.05E-06          | 1.10 (1.06-1.15) | TNXA | 4.45E-05          | 1.20  |
| 6          | rs117794128 | 32321833  | A  | G    | 0.121                            | 345441   | 3.83E-06          | 1.10 (1.05-1.14) | TNXA | 3.49E-05          | 1.17  |
| 6          | rs117040717 | 32329731  | T  | C    | 0.120                            | 353339   | 2.92E-06          | 1.10 (1.05-1.14) | TNXA | 3.49E-05          | 1.17  |
| 6          | rs3129915   | 32332264  | G  | A    | 0.127                            | 355872   | 6.50E-07          | 1.10 (1.06-1.14) | TNXA | 3.49E-05          | 1.17  |
| 6          | rs3129916   | 32332322  | G  | A    | 0.127                            | 355930   | 6.50E-07          | 1.10 (1.06-1.14) | TNXA | 3.49E-05          | 1.17  |
| 6          | rs3129924   | 32333299  | C  | T    | 0.127                            | 356907   | 8.01E-07          | 1.10 (1.06-1.14) | TNXA | 3.49E-05          | 1.17  |
| 6          | rs3129925   | 32333419  | G  | A    | 0.127                            | 357027   | 6.50E-07          | 1.10 (1.06-1.14) | TNXA | 3.49E-05          | 1.17  |
| 6          | rs3129926   | 32333480  | T  | C    | 0.126                            | 357088   | 6.30E-07          | 1.10 (1.06-1.14) | TNXA | 3.49E-05          | 1.17  |
| 6          | rs2143462   | 32335204  | G  | A    | 0.127                            | 358812   | 6.50E-07          | 1.10 (1.06-1.14) | TNXA | 3.49E-05          | 1.17  |
| 6          | rs2143461   | 32335347  | G  | A    | 0.127                            | 358955   | 6.50E-07          | 1.10 (1.06-1.14) | TNXA | 3.49E-05          | 1.17  |
| 6          | rs3129935   | 32336205  | A  | G    | 0.127                            | 359813   | 6.50E-07          | 1.10 (1.06-1.14) | TNXA | 3.49E-05          | 1.17  |
| 6          | rs3129937   | 32336364  | C  | A    | 0.127                            | 359972   | 6.50E-07          | 1.10 (1.06-1.14) | TNXA | 3.49E-05          | 1.17  |
| 6          | rs117433623 | 32403963  | C  | G    | 0.108                            | 427571   | 6.34E-09          | 1.13 (1.08-1.18) | TNXA | 3.49E-05          | 1.17  |

\*Positions are based on the Genome Reference Consortium human build 37 (GRCh37)

**Supplementary Table S5.** Summary of the TWAS with the susceptibility loci for CD in Japanese (HLA region)

| Tissue                              | Gene     | GWAS      |         | eQTL       |      |         | TWAS    |          |          |
|-------------------------------------|----------|-----------|---------|------------|------|---------|---------|----------|----------|
|                                     |          | Best SNP  | Z-Score | SNP        | R2   | Z-Score | Z-Score | P-Value  | FDR      |
| Whole blood                         | HLA-DRB9 | rs9271170 | -6.08   | rs9271170  | 0.16 | -7.91   | 5.74    | 9.63E-09 | 2.86E-05 |
| Whole blood                         | HLA-DRB6 | rs9271170 | -6.08   | rs28366298 | 0.38 | 11.81   | 5.33    | 9.84E-08 | 1.95E-04 |
| Whole blood                         | HLA-DQA2 | rs9271170 | -6.08   | rs28366298 | 0.49 | 13.48   | 4.94    | 7.93E-07 | 1.18E-03 |
| Whole blood                         | HLA-DRB1 | rs9271170 | -6.08   | rs28366298 | 0.18 | -8.27   | -4.48   | 7.38E-06 | 8.76E-03 |
| Whole blood                         | HLA-DQB1 | rs9271170 | -6.08   | rs1063355  | 0.61 | 14.94   | -4.13   | 3.64E-05 | 3.10E-02 |
| Whole blood                         | HLA-DQB2 | rs9271170 | -6.08   | rs1063355  | 0.58 | -14.60  | 4.13    | 3.66E-05 | 3.10E-02 |
| Blood · EBV-transformed lymphocytes | HLA-DRB6 | rs9271170 | -6.08   | rs9271170  | 0.44 | -7.62   | 5.16    | 2.52E-07 | 6.89E-04 |
| Blood · EBV-transformed lymphocytes | HLA-DQA2 | rs9271170 | -6.08   | rs1063355  | 0.62 | -8.43   | 4.42    | 9.71E-06 | 9.02E-03 |
| Blood · EBV-transformed lymphocytes | HLA-DQB2 | rs9271170 | -6.08   | rs1063355  | 0.72 | -9.11   | 4.42    | 9.90E-06 | 9.02E-03 |
| Blood · EBV-transformed lymphocytes | HLA-DQB1 | rs9271170 | -6.08   | rs1063355  | 0.67 | 8.81    | -4.27   | 2.00E-05 | 1.37E-02 |
| Blood · EBV-transformed lymphocytes | HLA-DRB5 | rs9271170 | -6.08   | rs9271055  | 0.45 | 7.21    | -4.11   | 3.92E-05 | 2.14E-02 |
| Small Intestine · Terminal Ileum    | HLA-DRB6 | rs9271170 | -6.08   | rs9271055  | 0.38 | -6.93   | 5.31    | 1.08E-07 | 3.07E-04 |
| Small Intestine · Terminal Ileum    | HLA-DQA2 | rs9271170 | -6.08   | rs1063355  | 0.41 | -7.59   | 5.06    | 4.20E-07 | 5.97E-04 |
| Small Intestine · Terminal Ileum    | HLA-DRB5 | rs9271170 | -6.08   | rs9271055  | 0.45 | 7.42    | -4.80   | 1.62E-06 | 1.54E-03 |
| Small Intestine · Terminal Ileum    | HLA-DQB2 | rs9271170 | -6.08   | rs1063355  | 0.52 | -8.04   | 4.08    | 4.49E-05 | 3.19E-02 |
| Small Intestine · Terminal Ileum    | HLA-DRB9 | rs9271170 | -6.08   | rs9271055  | 0.25 | -5.67   | 3.92    | 8.72E-05 | 4.96E-02 |
| Colon · Transverse                  | HLA-DQA2 | rs9271170 | -6.08   | rs28366298 | 0.42 | 10.72   | 5.46    | 4.67E-08 | 2.46E-04 |
| Colon · Transverse                  | HLA-DRB6 | rs9271170 | -6.08   | rs28366298 | 0.45 | 10.51   | 4.97    | 6.76E-07 | 1.78E-03 |
| Colon · Sigmoid                     | HLA-K    | rs9258158 | -2.84   | rs375984   | 0.12 | -5.54   | 7.78    | 7.40E-15 | 3.57E-11 |
| Colon · Sigmoid                     | HLA-DQA2 | rs9271170 | -6.08   | rs28366298 | 0.51 | 10.19   | 4.91    | 9.34E-07 | 2.25E-03 |
| Colon · Sigmoid                     | HLA-DRB6 | rs9271170 | -6.08   | rs28366298 | 0.51 | 10.21   | 4.55    | 5.29E-06 | 8.50E-03 |
| Colon · Sigmoid                     | HLA-DQB2 | rs9271170 | -6.08   | rs1063355  | 0.55 | -10.53  | 4.29    | 1.82E-05 | 1.91E-02 |
| Colon · Sigmoid                     | HLA-DQB1 | rs9271170 | -6.08   | rs1063355  | 0.58 | 10.87   | -4.27   | 1.98E-05 | 1.91E-02 |
| Colon · Sigmoid                     | HLA-DQA1 | rs9271170 | -6.08   | rs1063355  | 0.25 | 7.21    | -4.12   | 3.73E-05 | 3.00E-02 |

GWAS: genome-wide association study, TWAS: transcriptome-wide association study, FDR: false discovery rate



Supplementary Table S6. TWAS results of the candidate genes in other tissues

| Gene            | TWAS P-value |             |                 |                  |               |
|-----------------|--------------|-------------|-----------------|------------------|---------------|
|                 | Whole blood  | Lymphocytes | Small intestine | Transverse colon | Sigmoid colon |
| <i>TNFSF15</i>  | 2.28E-17     | NA          | NA              | NA               | NA            |
| <i>APOBEC3A</i> | 9.66E-05     | NA          | NA              | NA               | NA            |
| <i>ERV3-1</i>   | 6.81E-04     | 4.79E-05    | 5.15E-03        | 1.54E-03         | 3.53E-03      |
| <i>RAP1A</i>    | 2.66E-01     | 2.42E-04    | NA              | NA               | NA            |
| <i>NPIPB9</i>   | NA           | 1.11E-02    | NA              | 8.74E-05         | 4.78E-04      |
| <i>IGLV3-29</i> | NA           | NA          | NA              | 1.29E-04         | NA            |
| <i>ZNF713</i>   | 3.92E-02     | 3.46E-02    | NA              | 3.33E-02         | 4.41E-05      |
| <i>WDR31</i>    | NA           | NA          | NA              | 3.07E-04         | 1.34E-04      |

**Supplementary Table S7.** eQTL data used in this study

| Tissue                              | Data Source         | No. of samples | No. of genes |
|-------------------------------------|---------------------|----------------|--------------|
| Whole blood                         | GTE <sub>x</sub> V7 | 369            | 6007         |
| Blood · EBV-transformed lymphocytes | GTE <sub>x</sub> V7 | 117            | 2758         |
| Small Intestine · Terminal Ileum    | GTE <sub>x</sub> V7 | 122            | 2879         |
| Colon · Sigmoid                     | GTE <sub>x</sub> V7 | 203            | 4874         |
| Colon · Transverse                  | GTE <sub>x</sub> V7 | 246            | 5316         |
| LPMC – Effector memory T Cell       | this study          | 20             | 2463         |
